# Supplementary material for: Voluntary and involuntary contributions to perceptually guided saccadic choices resolved with millisecond precision
Source: PubMed Central journal article supplement (PMC6645714; doi:10.7554/elife.46359), 2019-06-21
Supplement: elife-46359-supp1.pdf [file elife-46359-supp1.pdf]

| P/lum   | $\mu_b$ | $\sigma_b$ | $\rho_b$ | $\mu_{GO}^{aff}$ | $\sigma_{GO}^{aff}$ | $\mu_{CUE}^{aff}$ | $\sigma_{CUE}^{aff}$ | $\mu_{ERI}$ | $\sigma_{ERI}$ | $g_{ERI}$ | $\Delta_{ERI}$ | $a_{EX}$ | $d_{END}$ | $a_{END}$ | $\lambda$ |
|---------|---------|------------|----------|------------------|---------------------|-------------------|----------------------|-------------|----------------|-----------|----------------|----------|-----------|-----------|-----------|
| A/high  | 1.4     | 3.74       | -0.95    | 51               | 36                  | 76                | 5                    | 24          | 4              | 0         | 10             | 0.96     | -0.70     | 0.17      | 0.02      |
| A/med   | 1.4     | 3.74       | -0.95    | 51               | 36                  | 104               | 13                   | 24          | 3              | 0         | 14             | 1.15     | -0.54     | 0.17      | 0.02      |
| A/low   | 1.4     | 3.74       | -0.95    | 51               | 36                  | 126               | 19                   | 24          | 10             | 0         | 14             | 0.58     | -0.29     | 0.14      | 0.10      |
| P1/high | 4.1     | 4          | -0.92    | 48               | 40                  | 76                | 8                    | 20          | 2              | -0.6      | 2              | 0.36     | -0.60     | 0.23      | 0.00      |
| P1/med  | 4.1     | 4          | -0.92    | 48               | 40                  | 104               | 15                   | 24          | 2              | -0.5      | 1              | 0.39     | -0.58     | 0.22      | 0.00      |
| P1/low  | 4.1     | 4          | -0.92    | 48               | 40                  | 128               | 4                    | 9           | 8              | -0.1      | 3              | 0.15     | -0.20     | 0.42      | 0.02      |
| P2/high | 4.5     | 2.37       | -0.81    | 44               | 34                  | 88                | 7                    | 16          | 1              | -0.5      | 6              | 0.60     | -0.90     | 0.16      | 0.03      |
| P2/med  | 4.5     | 2.37       | -0.81    | 44               | 34                  | 113               | 13                   | 17          | 2              | -0.8      | 8              | 0.55     | -0.80     | 0.19      | 0.05      |
| P2/low  | 4.5     | 2.37       | -0.81    | 44               | 34                  | 129               | 10                   | 11          | 13             | -0.4      | 7              | 0.50     | -0.64     | 0.09      | 0.36      |
| P3/high | 1.7     | 1.7        | -0.91    | 47               | 40                  | 73                | 11                   | 26          | 6              | 0         | 15             | 0.90     | -0.59     | 0.18      | 0.01      |
| P3/med  | 1.7     | 1.7        | -0.91    | 47               | 40                  | 100               | 20                   | 22          | 2              | 0         | 17             | 1.03     | -0.18     | 0.16      | 0.00      |
| P3/low  | 1.7     | 1.7        | -0.91    | 47               | 40                  | 114               | 29                   | 22          | 9              | 0         | 10             | 0.44     | -0.27     | 0.11      | 0.07      |
| P4/high | 2.6     | 1.34       | -0.97    | 55               | 41                  | 75                | 2                    | 14          | 8              | -0.9      | 5              | 1.86     | -1.05     | 0.09      | 0.00      |
| P4/med  | 2.6     | 1.34       | -0.97    | 55               | 41                  | 111               | 4                    | 17          | 6              | -0.1      | 4              | 1.05     | -0.72     | 0.08      | 0.00      |
| P4/low  | 2.6     | 1.34       | -0.97    | 55               | 41                  | 154               | 22                   | 16          | 6              | 0.0       | 9              | 0.76     | -0.22     | 0.04      | 0.15      |
| P5/high | 2.3     | 1.82       | -0.92    | 54               | 35                  | 78                | 6                    | 24          | 5              | -0.4      | 12             | 0.81     | -0.68     | 0.11      | 0.03      |
| P5/med  | 2.3     | 1.82       | -0.92    | 54               | 35                  | 105               | 5                    | 21          | 4              | -0.2      | 16             | 1.00     | -0.22     | 0.11      | 0.00      |
| P5/low  | 2.3     | 1.82       | -0.92    | 54               | 35                  | 129               | 19                   | 24          | 7              | -0.4      | 11             | 0.43     | -0.23     | 0.10      | 0.00      |
| P6/high | 0.5     | 1.9        | -0.95    | 46               | 47                  | 67                | 8                    | 20          | 14             | -0.6      | 13             | 1.50     | -1.27     | 0.13      | 0.03      |
| P6/med  | 0.5     | 1.9        | -0.95    | 46               | 47                  | 91                | 7                    | 17          | 9              | -0.3      | 9              | 1.36     | -0.65     | 0.11      | 0.04      |
| P6/low  | 0.5     | 1.9        | -0.95    | 46               | 47                  | 117               | 12                   | 24          | 12             | -0.1      | 7              | 0.62     | -0.87     | 0.13      | 0.02      |

Parameters of the race-to-threshold model for individual participants. Participant (P1–P6) and luminance (high, medium, low) are indicated in the first column. For comparison, the results for the aggregate data (A) are shown at the top.
