# Supplementary material for: Voluntary and involuntary contributions to perceptually guided saccadic choices resolved with millisecond precision
Source: eLife. 2019 Jun 21;8:e46359. doi: 10.7554/eLife.46359 (PMC6645714; doi:10.7554/eLife.46359)
Supplement: Source data 1. [file elife-46359-data1.xlsx]

## Sheet: Sheet1
Psychophysical data used in the article:
Salinas E, Steinberg BR, Sussman LA, Fry SM, Hauser CK, Anderson DD, Stanford TR (2019)
Voluntary and involuntary contributions to perceptually guided saccadic choices resolved with millisecond precision
eLife.
Each row corresponds to one trial, where:
Gap and Reaction time are in milliseconds
Gap is positive for standard urgent trials and negative for non-urgent trials (i.e., negative gaps are delays between cue onset and go), such that the processing time is always rPT = RT - gap
Hit indicates the trial outcome, correct (1) or incorrect (0)
Target location is left (-1) or right (1)
Luminance is high (1), medium (2), or low (3)
Participant identifies each participant (1-6)
Block number identifies the blocks (1-30) performed by each participant
Trial number identifies each trial (1-150) in each block
Gap	Reaction time	Hit	Target location	Luminance	Participant	Block number	Trial number
200	353	0	1	1	1	1	1
75	326	1	-1	2	1	1	2
250	516	1	1	2	1	1	4
-200	572	1	1	3	1	1	5
150	368	1	1	1	1	1	6
150	388	1	-1	1	1	1	7
-200	537	1	1	3	1	1	8
200	474	1	1	3	1	1	10
0	304	1	1	2	1	1	11
200	431	1	1	1	1	1	12
75	326	1	-1	1	1	1	14
175	386	1	1	1	1	1	15
125	382	1	1	2	1	1	16
-100	253	0	-1	2	1	1	17
350	483	0	-1	1	1	1	18
75	386	1	-1	3	1	1	19
-200	449	1	-1	3	1	1	20
-100	279	1	-1	1	1	1	21
125	311	0	-1	3	1	1	22
0	236	1	-1	2	1	1	23
0	230	1	-1	2	1	1	24
150	324	1	-1	2	1	1	25
350	472	0	1	1	1	1	26
250	446	0	-1	3	1	1	27
100	321	1	-1	1	1	1	28
175	485	1	1	3	1	1	29
-200	312	1	1	3	1	1	30
250	518	1	1	2	1	1	31
-100	281	1	-1	2	1	1	32
125	334	1	-1	2	1	1	33
100	308	1	1	1	1	1	34
100	367	1	-1	3	1	1	35
-100	297	1	1	3	1	1	36
250	460	1	-1	1	1	1	37
200	343	1	1	1	1	1	38
125	448	1	1	3	1	1	39
100	339	1	1	2	1	1	40
-200	221	1	1	1	1	1	41
175	327	0	1	2	1	1	42
200	367	0	-1	2	1	1	43
-200	304	1	-1	3	1	1	44
150	360	1	-1	1	1	1	45
125	319	1	-1	1	1	1	46
250	451	1	1	2	1	1	47
-100	285	1	-1	3	1	1	48
100	245	0	-1	1	1	1	49
150	298	0	1	3	1	1	50
75	354	1	-1	2	1	1	52
0	330	1	-1	3	1	1	53
-100	301	1	-1	3	1	1	54
350	405	1	1	1	1	1	55
-200	217	1	1	1	1	1	56
175	349	1	1	2	1	1	57
-200	242	1	1	2	1	1	58
125	334	1	1	3	1	1	59
75	323	1	-1	2	1	1	60
200	459	1	1	3	1	1	61
150	380	1	-1	1	1	1	62
100	358	1	-1	2	1	1	63
0	209	1	1	1	1	1	64
75	346	1	-1	2	1	1	65
-100	293	1	1	3	1	1	66
-200	361	1	-1	3	1	1	67
250	428	1	1	1	1	1	68
-100	331	1	-1	1	1	1	69
175	309	0	-1	1	1	1	70
350	338	1	1	2	1	1	71
0	327	1	-1	3	1	1	72
200	542	1	-1	3	1	1	73
200	449	1	-1	1	1	1	74
150	350	1	1	1	1	1	75
200	434	1	1	2	1	1	76
75	278	1	-1	1	1	1	77
125	365	1	1	2	1	1	78
-100	419	0	1	3	1	1	79
75	307	1	-1	1	1	1	80
-200	265	1	-1	2	1	1	81
-100	221	1	-1	1	1	1	82
250	483	1	1	2	1	1	83
0	389	1	-1	3	1	1	84
175	409	1	1	3	1	1	85
175	344	0	-1	2	1	1	86
0	252	1	-1	2	1	1	87
100	390	1	1	3	1	1	88
0	335	0	-1	2	1	1	89
350	498	1	1	1	1	1	90
-100	419	1	1	1	1	1	91
-200	506	1	-1	3	1	1	92
150	330	1	1	1	1	1	93
100	346	1	1	2	1	1	94
75	393	1	-1	3	1	1	95
-200	311	1	1	3	1	1	96
125	293	1	1	1	1	1	97
150	394	1	-1	1	1	1	98
175	350	0	-1	2	1	1	99
350	585	0	-1	3	1	1	100
250	555	1	1	3	1	1	101
250	468	1	1	2	1	1	102
-200	253	1	1	1	1	1	103
100	407	1	-1	3	1	1	104
-100	279	1	1	1	1	1	105
-200	215	1	-1	1	1	1	106
350	510	0	-1	2	1	1	107
125	353	1	-1	1	1	1	108
75	429	1	1	3	1	1	109
125	364	1	-1	2	1	1	110
75	362	1	1	2	1	1	111
250	551	1	1	3	1	1	112
-100	424	1	-1	1	1	1	113
175	399	1	1	2	1	1	114
150	425	1	1	1	1	1	115
-200	364	1	1	3	1	1	116
-100	294	1	1	2	1	1	117
0	309	1	-1	2	1	1	118
0	366	1	-1	3	1	1	121
150	381	1	-1	1	1	1	122
100	416	1	-1	3	1	1	123
-200	231	1	-1	1	1	1	125
200	376	0	-1	2	1	1	126
-100	360	1	1	3	1	1	127
350	483	1	1	3	1	1	128
-200	256	1	1	1	1	1	129
350	542	0	-1	2	1	1	130
175	512	1	1	3	1	1	131
150	454	1	1	2	1	1	132
250	476	1	-1	1	1	1	133
200	544	1	-1	3	1	1	134
250	413	0	-1	2	1	1	135
175	445	1	1	2	1	1	136
-100	252	1	-1	2	1	1	137
200	399	1	-1	1	1	1	138
125	404	1	1	2	1	1	139
-200	560	1	1	1	1	1	140
-100	359	1	1	3	1	1	141
125	351	1	1	1	1	1	142
100	464	1	-1	3	1	1	143
100	336	1	1	1	1	1	144
250	479	1	1	1	1	1	145
200	484	1	-1	2	1	1	146
75	409	1	1	3	1	1	147
200	410	1	1	2	1	1	148
-200	413	1	-1	2	1	1	149
-100	365	1	1	3	1	1	150
150	286	0	1	1	1	2	1
200	483	1	-1	2	1	2	2
100	426	1	1	3	1	2	3
125	439	1	-1	3	1	2	4
-200	530	1	-1	3	1	2	6
100	346	1	-1	1	1	2	7
-100	250	1	-1	1	1	2	8
-100	285	1	1	1	1	2	9
100	368	1	1	2	1	2	10
0	406	1	-1	2	1	2	11
250	474	1	1	1	1	2	13
0	276	1	-1	1	1	2	14
75	291	1	1	1	1	2	15
175	464	1	1	3	1	2	16
125	414	1	-1	2	1	2	17
200	466	1	1	3	1	2	18
-200	276	1	1	2	1	2	19
-100	341	1	1	3	1	2	20
-200	372	1	-1	3	1	2	21
250	507	1	1	2	1	2	22
0	274	1	-1	2	1	2	23
125	262	0	-1	1	1	2	24
150	385	1	1	3	1	2	25
75	336	1	-1	2	1	2	27
75	327	1	1	2	1	2	28
-100	265	1	-1	1	1	2	29
-100	321	1	-1	3	1	2	30
350	541	1	1	1	1	2	31
175	433	0	-1	3	1	2	32
-200	261	1	-1	1	1	2	33
150	348	1	1	1	1	2	35
250	491	1	1	2	1	2	36
350	483	0	1	1	1	2	37
0	354	1	1	3	1	2	38
175	431	0	-1	3	1	2	39
200	420	1	1	2	1	2	40
-200	305	1	1	2	1	2	41
-100	391	1	1	3	1	2	42
200	393	1	1	1	1	2	44
-200	256	1	-1	2	1	2	45
150	373	1	-1	2	1	2	46
75	358	1	-1	2	1	2	47
100	385	1	1	3	1	2	48
125	322	1	-1	1	1	2	49
125	442	1	-1	3	1	2	50
75	272	1	1	1	1	2	51
150	435	1	1	3	1	2	52
-100	319	1	1	3	1	2	53
175	400	1	1	2	1	2	55
-100	325	1	-1	3	1	2	56
-200	278	1	1	2	1	2	57
125	395	1	1	3	1	2	58
0	264	1	-1	2	1	2	60
100	357	1	1	3	1	2	61
75	314	1	-1	1	1	2	63
250	392	0	1	1	1	2	64
250	389	0	-1	1	1	2	65
-200	291	1	-1	2	1	2	66
150	373	1	-1	1	1	2	67
100	332	1	1	2	1	2	68
-100	262	1	-1	2	1	2	69
-200	231	1	1	1	1	2	70
0	263	1	-1	2	1	2	71
200	390	1	1	1	1	2	72
350	585	1	-1	2	1	2	73
0	277	1	1	2	1	2	74
100	508	1	1	3	1	2	75
125	335	1	-1	1	1	2	76
250	423	0	-1	3	1	2	77
150	347	1	1	1	1	2	78
-100	316	1	1	3	1	2	79
-200	316	1	-1	2	1	2	80
75	313	1	1	2	1	2	81
350	532	1	-1	2	1	2	82
0	286	1	1	2	1	2	83
-200	238	1	1	1	1	2	84
150	462	1	-1	3	1	2	85
175	368	1	-1	1	1	2	86
200	493	1	-1	3	1	2	87
150	356	1	-1	1	1	2	88
75	396	1	1	3	1	2	89
200	553	1	1	3	1	2	90
-100	266	1	-1	2	1	2	91
250	450	1	1	1	1	2	92
-100	236	1	1	1	1	2	93
-200	367	1	1	2	1	2	94
0	207	1	-1	1	1	2	95
350	472	1	1	2	1	2	97
175	490	1	1	2	1	2	99
250	550	1	-1	2	1	2	100
-200	316	1	-1	2	1	2	101
200	432	1	-1	2	1	2	102
125	377	1	1	2	1	2	103
-100	239	1	1	1	1	2	104
125	333	1	-1	1	1	2	105
175	322	0	-1	1	1	2	106
100	425	1	1	3	1	2	107
-100	339	1	-1	3	1	2	108
250	458	1	1	1	1	2	110
175	451	1	1	2	1	2	111
175	402	1	1	1	1	2	112
-200	414	1	-1	3	1	2	114
125	353	1	-1	1	1	2	115
150	405	0	1	3	1	2	116
-100	430	1	1	3	1	2	117
-200	391	1	-1	1	1	2	118
100	376	1	1	1	1	2	119
150	483	1	1	3	1	2	120
100	359	1	1	2	1	2	121
200	440	1	1	1	1	2	122
350	497	0	-1	1	1	2	123
200	510	1	-1	3	1	2	124
-200	527	1	1	3	1	2	125
250	403	1	1	1	1	2	126
-200	263	1	1	1	1	2	127
200	469	1	1	2	1	2	128
-100	337	1	1	2	1	2	129
75	315	0	-1	2	1	2	130
0	349	1	-1	2	1	2	133
350	559	1	1	1	1	2	136
-100	262	1	-1	1	1	2	137
125	278	0	-1	1	1	2	138
100	398	1	1	3	1	2	139
-200	365	1	-1	3	1	2	140
250	528	1	1	3	1	2	142
0	418	1	-1	3	1	2	144
125	344	1	-1	1	1	2	145
100	352	1	1	1	1	2	146
175	411	1	1	1	1	2	147
100	429	1	1	3	1	2	148
200	496	1	1	3	1	2	149
0	429	1	-1	3	1	2	150
125	337	1	-1	1	1	3	1
100	569	1	-1	3	1	3	2
150	342	1	1	1	1	3	3
150	450	1	1	2	1	3	4
-200	397	1	1	3	1	3	5
175	427	1	-1	1	1	3	6
-100	296	1	-1	2	1	3	8
75	328	1	-1	2	1	3	9
250	455	1	1	1	1	3	10
175	482	1	1	3	1	3	11
-200	324	1	1	2	1	3	12
125	420	1	-1	2	1	3	13
75	371	1	1	3	1	3	14
0	234	1	-1	1	1	3	15
-200	295	1	1	1	1	3	17
0	276	1	-1	2	1	3	18
100	337	1	1	2	1	3	19
200	350	0	-1	1	1	3	22
0	278	1	1	1	1	3	23
200	524	1	-1	3	1	3	24
175	372	1	1	1	1	3	25
75	353	1	-1	2	1	3	26
125	439	1	-1	3	1	3	27
200	517	1	1	2	1	3	28
250	390	0	-1	1	1	3	29
100	382	1	-1	2	1	3	30
-100	304	1	-1	2	1	3	31
-200	328	1	1	1	1	3	32
-200	313	1	1	2	1	3	33
250	518	1	-1	1	1	3	35
150	432	1	1	2	1	3	36
0	386	1	-1	3	1	3	37
150	347	1	-1	1	1	3	38
125	437	1	-1	3	1	3	39
125	424	1	1	3	1	3	40
-100	334	1	-1	2	1	3	41
200	460	1	1	1	1	3	42
200	482	0	-1	3	1	3	43
-100	251	1	1	1	1	3	44
-200	241	1	-1	1	1	3	45
175	521	1	1	3	1	3	46
150	459	1	1	2	1	3	47
125	353	1	-1	1	1	3	49
0	266	1	1	2	1	3	50
100	348	1	-1	1	1	3	51
-100	271	1	1	1	1	3	52
0	259	1	-1	2	1	3	53
175	510	1	1	3	1	3	54
75	335	1	-1	2	1	3	55
-100	321	1	-1	2	1	3	56
-200	407	1	1	3	1	3	57
150	382	1	1	2	1	3	58
250	540	0	-1	3	1	3	60
350	563	1	-1	1	1	3	61
175	412	1	1	2	1	3	62
250	558	1	-1	3	1	3	63
100	440	1	1	3	1	3	64
-200	238	1	-1	1	1	3	65
-100	250	1	1	1	1	3	66
75	418	1	1	1	1	3	67
200	483	1	-1	3	1	3	68
-200	278	1	-1	2	1	3	69
100	497	1	1	3	1	3	70
75	370	1	1	2	1	3	71
125	360	1	1	1	1	3	73
250	576	1	-1	3	1	3	76
-200	556	1	1	3	1	3	77
-100	540	1	-1	3	1	3	78
200	461	1	1	2	1	3	79
350	557	1	-1	1	1	3	80
-100	304	1	1	2	1	3	81
150	408	1	-1	1	1	3	83
100	386	1	-1	2	1	3	85
250	417	0	1	2	1	3	86
100	460	1	-1	3	1	3	87
75	315	1	1	1	1	3	88
-200	358	1	1	2	1	3	89
-100	541	1	1	3	1	3	90
125	440	1	-1	2	1	3	94
100	337	1	1	1	1	3	95
125	475	1	1	3	1	3	96
150	410	1	1	2	1	3	97
75	352	1	-1	2	1	3	98
175	536	1	1	3	1	3	100
0	466	1	1	3	1	3	101
150	444	1	1	3	1	3	103
200	502	1	-1	3	1	3	104
-100	245	1	-1	1	1	3	105
-100	393	1	1	2	1	3	106
75	274	1	-1	1	1	3	107
0	210	1	-1	1	1	3	108
150	401	1	1	1	1	3	109
250	472	1	-1	2	1	3	110
150	374	1	1	2	1	3	111
75	335	1	1	1	1	3	112
200	541	1	-1	3	1	3	113
100	348	1	-1	2	1	3	116
-200	386	1	-1	2	1	3	117
-100	262	1	1	1	1	3	118
125	376	1	1	1	1	3	120
75	492	1	1	3	1	3	121
0	286	1	-1	1	1	3	122
200	558	1	-1	3	1	3	123
-100	233	1	1	1	1	3	125
175	439	1	1	2	1	3	126
0	299	1	-1	2	1	3	127
-200	334	1	1	2	1	3	128
125	413	1	1	1	1	3	129
100	335	1	1	1	1	3	131
200	470	1	-1	2	1	3	133
175	502	1	1	3	1	3	134
125	387	1	1	2	1	3	135
175	466	0	1	3	1	3	136
-100	324	1	-1	2	1	3	138
75	377	1	1	2	1	3	139
150	349	1	-1	1	1	3	140
-100	349	1	-1	3	1	3	141
-200	255	1	1	1	1	3	142
100	443	1	1	3	1	3	143
175	399	1	-1	1	1	3	145
200	468	1	1	1	1	3	146
0	281	1	-1	2	1	3	147
125	339	1	1	1	1	4	1
200	393	1	1	1	1	4	3
-200	262	1	-1	2	1	4	4
150	397	1	1	2	1	4	5
200	459	1	1	2	1	4	6
-200	323	1	1	2	1	4	7
125	356	1	-1	1	1	4	9
250	561	1	1	3	1	4	10
175	435	1	-1	2	1	4	11
-100	342	1	1	3	1	4	12
75	283	1	-1	1	1	4	13
150	358	1	-1	1	1	4	15
250	574	1	-1	3	1	4	16
-100	315	1	-1	2	1	4	17
-200	291	1	1	1	1	4	18
100	355	1	1	2	1	4	20
-100	262	1	-1	1	1	4	21
150	485	1	1	3	1	4	22
75	334	1	1	1	1	4	23
350	519	0	1	3	1	4	24
175	427	1	1	2	1	4	25
100	364	1	-1	2	1	4	26
175	422	1	-1	2	1	4	27
250	423	0	-1	1	1	4	28
0	227	1	-1	1	1	4	30
100	418	1	1	3	1	4	31
-100	586	1	1	3	1	4	33
200	434	1	1	2	1	4	34
0	257	1	-1	1	1	4	35
75	416	1	1	3	1	4	36
0	366	1	-1	3	1	4	37
150	400	1	1	2	1	4	38
0	266	1	-1	2	1	4	39
75	390	1	-1	3	1	4	40
0	263	1	-1	2	1	4	41
250	440	1	1	1	1	4	42
-200	583	1	1	3	1	4	43
-100	310	1	1	1	1	4	44
125	402	1	1	1	1	4	45
350	546	1	1	1	1	4	46
150	484	1	-1	3	1	4	47
-100	249	1	-1	1	1	4	48
250	549	0	-1	3	1	4	49
200	533	1	-1	3	1	4	50
250	485	1	1	1	1	4	51
200	368	0	-1	1	1	4	52
200	580	1	1	3	1	4	53
-100	299	1	-1	1	1	4	54
100	411	1	-1	3	1	4	55
-200	278	1	-1	2	1	4	56
-100	303	1	1	2	1	4	57
150	419	1	1	2	1	4	60
100	393	1	1	3	1	4	61
100	425	1	-1	3	1	4	62
350	483	0	-1	1	1	4	63
75	323	1	1	2	1	4	64
-100	220	1	-1	1	1	4	65
-200	254	1	-1	2	1	4	66
175	417	1	-1	2	1	4	67
125	325	1	1	1	1	4	68
-200	266	1	1	1	1	4	69
175	394	1	1	1	1	4	70
125	381	1	1	2	1	4	71
175	486	1	1	3	1	4	72
250	436	1	1	1	1	4	73
0	425	1	1	3	1	4	74
250	453	1	1	1	1	4	76
200	457	1	-1	1	1	4	77
125	322	1	1	1	1	4	78
-200	495	1	1	3	1	4	79
-100	274	1	-1	2	1	4	80
250	495	1	1	2	1	4	81
125	404	1	1	2	1	4	82
175	428	0	-1	3	1	4	83
-200	290	1	1	2	1	4	84
0	293	1	-1	2	1	4	85
0	372	1	1	3	1	4	86
150	381	1	-1	2	1	4	88
75	351	1	-1	2	1	4	89
-100	148	0	1	1	1	4	90
-100	245	1	-1	1	1	4	92
175	489	1	1	3	1	4	93
-200	214	1	-1	1	1	4	94
125	379	1	-1	1	1	4	95
75	377	1	1	2	1	4	96
150	397	1	-1	2	1	4	97
350	492	0	1	1	1	4	98
-200	277	1	1	1	1	4	99
200	492	1	1	1	1	4	100
-100	269	1	-1	2	1	4	101
175	472	1	1	3	1	4	102
100	309	1	-1	1	1	4	103
-100	508	1	1	3	1	4	104
150	474	1	-1	3	1	4	105
100	387	1	1	3	1	4	106
75	273	1	1	1	1	4	107
0	268	1	-1	2	1	4	110
0	244	1	1	2	1	4	111
75	378	1	-1	3	1	4	112
-200	251	1	-1	1	1	4	113
-200	282	1	1	2	1	4	114
150	454	1	-1	3	1	4	115
200	490	1	-1	2	1	4	116
350	547	0	1	3	1	4	118
125	352	1	-1	1	1	4	119
250	488	1	1	2	1	4	120
150	406	1	1	2	1	4	121
150	497	1	-1	3	1	4	122
175	383	1	1	1	1	4	123
125	336	1	1	1	1	4	124
0	360	1	-1	3	1	4	126
200	506	1	1	3	1	4	127
-200	260	1	1	2	1	4	128
250	477	0	-1	3	1	4	129
-100	231	1	-1	1	1	4	130
100	306	1	1	1	1	4	131
75	341	1	-1	2	1	4	133
100	350	1	-1	2	1	4	134
125	386	1	1	2	1	4	135
250	422	1	-1	1	1	4	136
-200	401	1	1	3	1	4	137
200	400	1	1	1	1	4	138
175	543	1	-1	3	1	4	139
-200	272	1	-1	1	1	4	140
-100	284	1	1	2	1	4	141
100	368	1	1	3	1	4	143
175	427	1	-1	2	1	4	144
100	356	1	1	2	1	4	145
150	393	1	1	2	1	4	147
200	489	1	1	3	1	4	148
125	448	1	1	3	1	5	1
175	393	1	1	2	1	5	2
250	422	0	-1	2	1	5	3
250	518	1	1	2	1	5	4
-100	288	1	-1	1	1	5	5
125	350	1	1	2	1	5	6
100	383	1	1	3	1	5	7
-200	282	1	1	2	1	5	8
250	475	1	-1	1	1	5	10
200	427	1	1	1	1	5	11
-200	344	1	-1	1	1	5	12
125	562	1	-1	3	1	5	13
350	515	1	-1	1	1	5	14
100	301	1	1	1	1	5	15
75	309	1	1	1	1	5	16
-100	405	1	-1	3	1	5	17
-100	317	1	1	3	1	5	18
0	359	1	-1	3	1	5	19
0	258	1	-1	2	1	5	20
75	309	1	-1	2	1	5	22
350	524	1	1	3	1	5	23
150	370	1	1	1	1	5	24
200	437	1	-1	2	1	5	25
175	369	1	-1	1	1	5	27
200	405	1	-1	1	1	5	28
175	326	1	1	1	1	5	29
-200	293	1	-1	1	1	5	30
-200	337	1	1	2	1	5	32
-100	416	1	1	3	1	5	45
250	380	0	1	2	1	5	46
200	484	1	-1	2	1	5	47
175	438	1	1	3	1	5	48
200	407	1	-1	2	1	5	49
175	422	1	1	2	1	5	50
150	435	1	1	3	1	5	51
125	348	1	-1	1	1	5	52
-100	350	1	-1	2	1	5	53
150	452	1	-1	3	1	5	55
100	335	1	1	3	1	5	56
-200	238	1	-1	1	1	5	57
250	465	1	1	1	1	5	59
75	318	1	1	1	1	5	60
250	490	1	-1	2	1	5	61
125	402	1	-1	1	1	5	63
100	297	1	1	1	1	5	64
-100	339	1	-1	1	1	5	65
100	405	1	-1	3	1	5	66
75	301	1	1	1	1	5	67
-100	260	1	-1	2	1	5	68
-200	430	1	1	3	1	5	69
200	481	1	-1	3	1	5	70
75	320	1	1	2	1	5	71
100	344	1	-1	2	1	5	73
150	379	1	-1	2	1	5	74
175	441	1	-1	2	1	5	75
150	358	1	1	1	1	5	76
350	582	1	-1	3	1	5	77
-200	357	1	1	3	1	5	78
-200	571	1	1	2	1	5	79
175	305	0	-1	1	1	5	81
175	371	0	-1	3	1	5	82
-100	223	1	1	1	1	5	84
0	308	1	-1	3	1	5	86
0	218	1	1	1	1	5	87
75	409	1	1	3	1	5	88
350	540	1	-1	3	1	5	90
75	333	1	1	2	1	5	91
-100	265	1	-1	1	1	5	92
150	337	1	1	2	1	5	93
125	482	1	1	1	1	5	94
0	250	1	-1	1	1	5	95
-100	269	1	1	2	1	5	96
100	309	1	1	1	1	5	97
350	472	1	-1	3	1	5	98
100	302	1	1	2	1	5	99
250	399	0	-1	2	1	5	100
75	329	1	1	1	1	5	101
-200	354	1	-1	3	1	5	102
200	377	1	1	2	1	5	103
125	351	1	-1	1	1	5	104
-100	327	1	1	3	1	5	105
-100	314	1	1	3	1	5	106
200	364	0	-1	2	1	5	107
250	426	1	1	2	1	5	108
125	376	1	1	2	1	5	109
100	362	1	-1	1	1	5	111
250	408	0	-1	3	1	5	112
-200	233	1	-1	1	1	5	113
200	531	1	1	3	1	5	114
-100	327	1	-1	3	1	5	115
-200	308	1	1	1	1	5	116
0	433	1	1	3	1	5	117
150	297	1	-1	1	1	5	118
250	448	1	1	1	1	5	119
75	335	1	-1	2	1	5	120
175	396	1	-1	2	1	5	121
175	461	1	1	3	1	5	122
75	301	1	1	1	1	5	123
350	580	1	-1	2	1	5	124
100	341	1	1	1	1	5	125
0	318	1	-1	3	1	5	126
-200	399	1	1	3	1	5	127
150	425	1	-1	3	1	5	128
-100	242	1	-1	1	1	5	129
-100	264	1	1	2	1	5	130
200	532	1	1	3	1	5	131
350	532	1	1	1	1	5	132
250	449	1	1	1	1	5	133
150	355	1	-1	1	1	5	134
75	318	1	-1	2	1	5	135
125	388	1	-1	3	1	5	136
-200	348	1	1	3	1	5	137
-200	297	1	-1	2	1	5	138
350	577	1	1	2	1	5	139
-100	325	1	-1	3	1	5	141
100	333	1	1	2	1	5	142
125	310	1	-1	1	1	5	143
200	417	1	1	2	1	5	144
75	330	1	-1	2	1	5	145
150	459	1	-1	3	1	5	146
-200	215	1	-1	1	1	5	147
75	354	1	-1	3	1	5	148
150	426	0	1	3	1	5	149
-100	206	1	1	1	1	5	150
250	564	1	1	3	1	6	1
200	443	1	-1	3	1	6	2
125	348	1	1	1	1	6	3
75	334	1	-1	3	1	6	4
-100	316	1	-1	3	1	6	5
-200	258	1	-1	1	1	6	6
125	377	1	1	1	1	6	8
-200	279	1	-1	2	1	6	9
350	510	0	1	2	1	6	11
350	511	0	1	2	1	6	12
175	422	1	1	2	1	6	13
200	374	0	-1	2	1	6	14
75	308	1	-1	1	1	6	15
350	498	1	1	2	1	6	16
-100	300	1	1	3	1	6	17
-200	294	1	-1	2	1	6	18
150	366	1	1	3	1	6	19
175	311	0	1	1	1	6	20
-100	271	1	1	1	1	6	21
250	378	1	1	3	1	6	22
0	241	1	-1	2	1	6	23
0	148	0	-1	1	1	6	24
150	318	1	1	3	1	6	25
250	452	0	1	3	1	6	26
100	316	0	-1	2	1	6	27
125	265	0	-1	1	1	6	28
-200	398	1	-1	3	1	6	29
-100	274	1	1	2	1	6	30
100	324	1	-1	2	1	6	31
175	379	0	-1	3	1	6	32
-200	255	1	-1	1	1	6	33
200	408	1	1	2	1	6	34
0	205	1	-1	1	1	6	35
75	288	1	-1	2	1	6	36
0	235	1	1	1	1	6	37
0	237	1	1	1	1	6	38
250	403	1	-1	3	1	6	39
175	411	1	1	2	1	6	40
-100	404	1	1	3	1	6	41
125	321	1	1	1	1	6	42
-200	228	1	-1	1	1	6	43
-100	243	1	1	1	1	6	44
150	428	1	-1	3	1	6	45
175	404	1	1	2	1	6	46
75	350	1	1	3	1	6	47
350	382	0	-1	2	1	6	48
250	472	1	-1	2	1	6	49
150	393	1	1	2	1	6	50
200	398	1	1	1	1	6	51
-200	241	1	-1	1	1	6	52
350	409	1	1	2	1	6	53
-100	356	1	1	3	1	6	54
75	286	0	-1	3	1	6	55
125	364	1	1	2	1	6	56
-100	264	1	-1	2	1	6	57
350	493	0	-1	3	1	6	58
200	401	1	1	1	1	6	59
75	352	1	-1	3	1	6	60
250	393	0	-1	3	1	6	61
0	250	1	-1	2	1	6	62
100	328	1	-1	1	1	6	63
100	307	1	-1	1	1	6	64
175	457	1	1	3	1	6	65
-200	587	1	1	3	1	6	66
-200	232	1	1	1	1	6	67
150	405	1	1	2	1	6	68
-100	302	1	1	1	1	6	69
125	327	1	-1	2	1	6	70
100	373	1	1	3	1	6	71
200	407	1	-1	1	1	6	72
100	329	1	-1	1	1	6	73
125	354	1	1	1	1	6	74
200	380	1	1	2	1	6	75
-200	357	1	1	2	1	6	77
250	436	1	-1	2	1	6	78
175	446	1	-1	3	1	6	79
-200	384	1	1	1	1	6	80
125	352	1	-1	1	1	6	81
-100	219	1	1	1	1	6	82
100	351	1	-1	3	1	6	83
0	248	1	-1	2	1	6	84
100	303	1	-1	1	1	6	85
250	527	1	1	2	1	6	86
200	459	1	1	2	1	6	87
250	421	1	1	1	1	6	88
-200	227	1	-1	1	1	6	89
125	389	1	1	3	1	6	90
-100	389	1	1	3	1	6	91
150	435	0	1	3	1	6	92
150	467	1	1	3	1	6	93
-100	277	1	-1	2	1	6	94
0	327	1	-1	3	1	6	95
75	303	1	-1	2	1	6	96
150	449	1	-1	3	1	6	97
200	421	0	1	3	1	6	98
75	291	1	-1	2	1	6	99
350	487	1	-1	3	1	6	100
-200	223	1	1	1	1	6	101
-100	313	1	1	1	1	6	102
0	326	1	-1	3	1	6	103
75	285	1	-1	1	1	6	104
-200	213	1	1	1	1	6	105
175	478	1	-1	2	1	6	107
175	367	1	-1	2	1	6	108
250	410	0	1	2	1	6	109
100	369	1	1	3	1	6	110
0	227	1	1	2	1	6	111
-200	542	1	1	2	1	6	112
175	353	1	1	1	1	6	113
-100	214	1	-1	1	1	6	114
200	379	1	-1	1	1	6	115
350	493	1	1	3	1	6	116
-100	312	1	-1	3	1	6	117
250	328	1	1	2	1	6	118
175	382	1	-1	1	1	6	119
350	508	0	-1	2	1	6	120
200	431	1	-1	2	1	6	121
75	301	1	-1	1	1	6	122
75	431	1	1	3	1	6	123
100	352	1	1	2	1	6	124
0	226	1	1	1	1	6	125
-200	382	1	-1	1	1	6	126
350	513	0	-1	2	1	6	127
-100	271	1	1	2	1	6	128
250	561	1	1	3	1	6	129
125	330	1	1	1	1	6	130
150	354	0	-1	3	1	6	131
-100	307	1	-1	2	1	6	132
200	486	1	-1	3	1	6	133
175	396	1	1	1	1	6	134
125	342	0	-1	3	1	6	135
100	359	1	1	2	1	6	136
0	259	1	1	2	1	6	137
-200	397	1	-1	3	1	6	138
-200	241	1	1	1	1	6	139
125	371	1	-1	1	1	6	140
150	357	1	-1	2	1	6	142
150	367	0	1	3	1	6	143
75	279	1	-1	1	1	6	144
100	302	1	1	1	1	6	145
0	247	1	1	1	1	6	146
0	207	1	1	1	1	6	147
175	365	0	1	2	1	6	148
125	376	1	1	3	1	6	149
-100	507	1	1	3	1	6	150
75	306	1	1	2	1	7	2
125	350	0	-1	3	1	7	3
175	366	1	1	1	1	7	5
-200	276	1	-1	2	1	7	6
350	486	0	-1	3	1	7	7
100	460	1	1	3	1	7	8
-200	368	1	-1	3	1	7	9
75	269	0	-1	2	1	7	10
0	224	1	-1	1	1	7	11
200	408	1	-1	2	1	7	12
250	376	0	1	1	1	7	13
350	539	1	1	2	1	7	14
125	342	1	1	1	1	7	15
100	344	1	1	2	1	7	16
100	373	1	1	3	1	7	18
-100	423	1	1	3	1	7	19
150	349	1	-1	1	1	7	20
-200	410	1	-1	3	1	7	21
0	268	1	1	2	1	7	22
350	290	0	1	1	1	7	23
0	254	1	-1	2	1	7	24
200	350	0	-1	2	1	7	25
150	340	1	-1	1	1	7	26
75	269	1	1	2	1	7	27
175	393	1	1	3	1	7	28
-200	344	1	-1	3	1	7	29
175	342	1	1	2	1	7	30
250	396	1	1	1	1	7	31
-100	296	1	1	3	1	7	32
-100	248	1	1	2	1	7	33
200	402	0	-1	3	1	7	34
250	415	1	1	3	1	7	35
150	411	1	-1	2	1	7	36
250	492	1	-1	1	1	7	37
200	410	1	-1	2	1	7	38
125	371	1	1	3	1	7	39
75	305	1	-1	2	1	7	40
-200	389	1	-1	3	1	7	41
100	253	0	1	1	1	7	42
-100	278	1	1	1	1	7	43
350	565	1	1	2	1	7	44
-200	281	1	-1	1	1	7	45
0	213	1	1	1	1	7	46
125	344	1	-1	1	1	7	47
175	515	0	-1	3	1	7	48
250	460	0	-1	3	1	7	49
200	435	1	-1	3	1	7	50
250	399	0	1	2	1	7	51
350	529	1	1	1	1	7	52
0	239	1	1	1	1	7	53
175	391	1	-1	2	1	7	54
-200	274	1	1	2	1	7	55
75	280	1	-1	1	1	7	56
-100	346	1	-1	3	1	7	57
350	478	0	-1	1	1	7	59
150	375	1	-1	2	1	7	60
100	372	1	-1	3	1	7	61
75	324	1	-1	2	1	7	62
150	401	1	1	2	1	7	63
150	426	1	1	2	1	7	64
200	536	1	1	3	1	7	65
0	343	1	1	3	1	7	66
125	322	1	1	1	1	7	67
-100	254	1	1	1	1	7	68
-200	208	1	-1	1	1	7	69
-100	337	1	1	3	1	7	70
175	428	1	1	3	1	7	71
100	327	1	-1	1	1	7	72
125	345	1	1	3	1	7	73
200	432	1	1	3	1	7	74
75	310	1	-1	1	1	7	75
200	408	0	-1	3	1	7	76
150	341	1	1	1	1	7	77
100	250	0	1	1	1	7	78
-100	324	1	-1	2	1	7	79
-100	282	1	1	2	1	7	80
350	385	0	-1	1	1	7	81
-200	234	1	1	1	1	7	82
250	376	0	-1	1	1	7	83
350	555	0	-1	3	1	7	84
125	439	1	1	3	1	7	85
250	418	1	-1	1	1	7	86
75	316	1	-1	2	1	7	87
75	319	1	1	2	1	7	88
175	421	0	-1	3	1	7	89
-200	567	1	1	3	1	7	90
-100	330	1	-1	3	1	7	91
100	317	1	1	2	1	7	92
-200	261	1	-1	2	1	7	93
250	450	1	1	1	1	7	94
125	370	1	1	2	1	7	95
0	256	1	-1	2	1	7	96
0	248	1	-1	2	1	7	97
100	397	1	-1	3	1	7	98
0	329	1	-1	3	1	7	99
175	375	0	1	3	1	7	100
200	350	0	1	1	1	7	101
175	430	1	1	3	1	7	102
-100	236	1	1	1	1	7	103
350	506	1	-1	1	1	7	104
-100	289	1	-1	2	1	7	105
-200	211	1	-1	1	1	7	106
150	324	1	-1	2	1	7	107
150	372	1	1	1	1	7	108
175	396	1	1	2	1	7	109
75	300	1	1	1	1	7	110
200	434	0	-1	3	1	7	111
0	365	1	1	3	1	7	112
-200	448	1	-1	1	1	7	113
100	347	1	-1	1	1	7	114
350	395	0	-1	2	1	7	115
-100	315	1	1	2	1	7	116
-200	411	1	1	2	1	7	117
100	375	1	1	3	1	7	118
150	371	1	1	2	1	7	119
150	483	1	-1	3	1	7	120
75	307	1	1	1	1	7	121
250	466	1	1	2	1	7	122
350	438	0	-1	1	1	7	123
125	435	1	1	3	1	7	124
-200	498	1	-1	3	1	7	125
-100	322	1	1	3	1	7	126
125	425	1	-1	3	1	7	127
75	250	0	-1	2	1	7	128
-100	243	1	1	1	1	7	129
250	478	1	1	2	1	7	130
150	380	1	1	2	1	7	131
175	498	1	-1	3	1	7	132
100	321	1	1	3	1	7	134
200	395	1	1	1	1	7	135
0	255	1	-1	2	1	7	136
-200	206	1	-1	1	1	7	137
0	198	1	-1	1	1	7	138
125	292	0	-1	2	1	7	139
-100	282	1	1	2	1	7	140
-200	314	1	-1	2	1	7	141
200	356	1	1	1	1	7	142
175	427	0	-1	3	1	7	143
250	434	1	-1	1	1	7	144
0	212	1	-1	1	1	7	145
200	432	1	-1	2	1	7	146
0	267	1	-1	2	1	7	147
150	486	1	1	2	1	7	148
125	390	1	-1	2	1	7	149
-100	389	1	-1	3	1	7	150
75	294	0	-1	1	1	8	1
100	276	1	1	1	1	8	2
125	417	1	-1	3	1	8	4
150	387	1	1	2	1	8	5
125	341	0	1	3	1	8	6
-200	381	1	1	3	1	8	7
-100	285	1	-1	3	1	8	8
0	204	1	-1	1	1	8	9
-200	257	1	1	3	1	8	10
150	356	1	-1	2	1	8	11
125	278	0	1	1	1	8	12
75	297	1	-1	2	1	8	13
350	424	1	1	2	1	8	14
350	469	0	1	1	1	8	15
-100	239	1	1	1	1	8	16
200	385	1	1	2	1	8	17
0	290	1	1	3	1	8	18
-200	208	1	-1	1	1	8	19
250	321	1	-1	3	1	8	20
150	253	0	-1	3	1	8	21
-100	267	1	-1	1	1	8	22
75	294	1	-1	2	1	8	23
100	329	1	1	2	1	8	24
250	473	1	1	3	1	8	25
250	455	1	1	2	1	8	26
175	347	0	-1	2	1	8	27
175	455	1	1	3	1	8	28
350	474	0	-1	3	1	8	29
200	410	1	1	3	1	8	30
-100	263	1	-1	1	1	8	31
100	304	1	1	1	1	8	32
-200	290	1	-1	2	1	8	33
0	231	1	1	1	1	8	34
175	316	1	1	1	1	8	35
-200	358	1	-1	1	1	8	36
200	310	0	-1	3	1	8	37
0	203	1	-1	1	1	8	38
175	422	1	1	2	1	8	39
250	396	1	1	3	1	8	40
-100	257	1	-1	2	1	8	41
-200	263	1	1	2	1	8	42
350	521	0	-1	2	1	8	43
125	361	1	1	2	1	8	44
-100	342	1	-1	3	1	8	45
350	495	1	1	1	1	8	46
175	390	1	-1	1	1	8	47
0	429	1	-1	3	1	8	48
100	322	1	1	2	1	8	49
200	328	0	1	1	1	8	50
350	391	0	-1	3	1	8	51
0	282	1	-1	3	1	8	52
150	328	1	1	1	1	8	53
-100	288	1	1	2	1	8	54
-200	381	1	1	3	1	8	55
175	396	1	-1	2	1	8	56
-200	193	1	-1	1	1	8	57
150	292	0	-1	1	1	8	58
250	467	1	1	2	1	8	59
75	486	1	1	3	1	8	60
100	283	1	-1	1	1	8	61
150	380	1	1	3	1	8	62
75	268	1	1	2	1	8	63
-100	236	1	-1	2	1	8	64
250	232	0	-1	2	1	8	65
100	413	1	1	3	1	8	66
-100	439	1	-1	3	1	8	67
125	284	1	1	1	1	8	68
200	420	1	-1	1	1	8	69
-200	389	1	-1	3	1	8	70
75	262	1	1	1	1	8	71
125	304	0	-1	2	1	8	72
100	301	0	-1	2	1	8	73
150	438	1	-1	3	1	8	74
200	410	0	-1	3	1	8	75
250	424	1	1	3	1	8	76
-100	279	1	1	1	1	8	77
200	332	0	1	2	1	8	78
125	397	1	1	2	1	8	79
-200	290	1	1	2	1	8	80
-100	238	1	1	1	1	8	81
175	410	1	-1	2	1	8	82
75	335	1	1	2	1	8	83
0	255	1	1	1	1	8	84
150	368	1	-1	1	1	8	85
75	270	1	-1	1	1	8	86
100	284	1	1	1	1	8	87
-100	248	1	-1	2	1	8	88
0	331	1	1	3	1	8	89
125	395	1	-1	3	1	8	90
-200	220	1	-1	1	1	8	91
-200	246	1	-1	2	1	8	92
150	432	1	-1	3	1	8	93
0	199	1	-1	1	1	8	94
100	412	1	1	3	1	8	95
250	526	1	1	3	1	8	96
75	322	1	-1	2	1	8	97
175	380	1	1	2	1	8	98
125	330	1	1	1	1	8	99
350	543	1	1	2	1	8	100
200	367	1	1	2	1	8	101
250	407	1	1	3	1	8	102
-200	374	1	-1	3	1	8	103
175	313	1	1	1	1	8	104
-200	596	1	1	3	1	8	105
-100	236	1	-1	1	1	8	106
350	508	0	-1	1	1	8	107
75	361	1	-1	2	1	8	109
250	544	1	1	3	1	8	110
0	247	1	1	1	1	8	111
200	380	1	1	1	1	8	112
0	328	1	1	3	1	8	113
-200	207	1	-1	1	1	8	114
150	455	1	-1	3	1	8	115
-100	332	1	-1	3	1	8	116
150	353	1	1	2	1	8	117
-100	256	1	-1	2	1	8	118
125	328	1	-1	1	1	8	119
200	388	0	-1	3	1	8	120
250	417	1	1	1	1	8	121
75	295	1	-1	2	1	8	122
0	240	1	1	2	1	8	123
75	290	1	1	1	1	8	124
-100	218	1	-1	1	1	8	125
-200	362	1	-1	3	1	8	126
100	341	1	1	3	1	8	127
125	372	1	-1	2	1	8	128
-200	264	1	-1	1	1	8	129
350	516	1	1	2	1	8	130
250	509	1	1	3	1	8	131
150	348	1	1	1	1	8	132
200	430	1	1	2	1	8	134
100	389	1	-1	3	1	8	135
175	417	1	-1	2	1	8	136
-100	241	1	-1	1	1	8	137
-100	277	1	-1	2	1	8	139
125	428	1	1	3	1	8	140
100	350	1	1	2	1	8	141
175	379	1	1	1	1	8	142
-200	482	1	1	3	1	8	144
250	401	1	1	1	1	8	145
175	393	1	1	2	1	8	146
0	240	1	1	1	1	8	147
-200	296	1	-1	2	1	8	148
200	420	1	-1	1	1	8	149
-100	287	1	-1	2	1	8	150
150	408	1	1	2	1	9	1
0	218	1	-1	1	1	9	2
200	361	0	-1	2	1	9	3
200	357	0	-1	3	1	9	4
175	396	1	-1	3	1	9	5
-200	320	1	1	2	1	9	6
100	395	1	1	3	1	9	7
-100	253	1	-1	1	1	9	8
-200	379	1	-1	3	1	9	9
125	351	1	-1	2	1	9	10
250	387	0	1	1	1	9	11
150	372	1	1	2	1	9	12
350	561	0	1	2	1	9	13
100	326	1	1	1	1	9	14
125	428	1	-1	3	1	9	16
250	503	1	1	3	1	9	17
-200	286	1	1	1	1	9	18
350	515	0	-1	2	1	9	19
-100	316	1	1	3	1	9	20
100	325	1	1	3	1	9	21
-100	266	1	-1	1	1	9	22
0	274	1	-1	2	1	9	23
175	357	1	1	1	1	9	24
350	528	1	1	2	1	9	25
150	377	1	-1	1	1	9	26
75	332	1	1	3	1	9	27
0	254	1	-1	2	1	9	28
-200	243	1	1	2	1	9	30
-100	324	1	-1	3	1	9	31
250	325	1	1	1	1	9	32
75	279	1	-1	1	1	9	34
200	348	0	-1	1	1	9	35
175	350	1	1	1	1	9	36
0	269	1	-1	3	1	9	37
175	423	1	1	3	1	9	38
125	376	1	1	3	1	9	39
100	354	1	-1	2	1	9	40
-100	267	1	1	2	1	9	41
350	350	1	1	1	1	9	42
-200	419	1	1	3	1	9	44
250	468	1	-1	1	1	9	45
-100	251	1	1	1	1	9	46
350	509	0	-1	2	1	9	47
125	387	1	1	2	1	9	48
100	272	1	1	1	1	9	49
125	422	1	1	3	1	9	50
-100	207	1	1	1	1	9	51
150	381	1	1	3	1	9	52
100	315	1	1	2	1	9	53
0	215	1	1	2	1	9	54
-200	418	1	-1	3	1	9	55
-200	271	1	-1	2	1	9	56
200	437	1	1	2	1	9	57
75	311	1	-1	1	1	9	58
150	306	0	-1	2	1	9	59
75	291	1	1	1	1	9	60
200	535	0	-1	3	1	9	61
0	215	1	1	1	1	9	62
175	399	1	-1	1	1	9	63
250	425	0	-1	2	1	9	64
175	359	1	-1	1	1	9	65
-100	218	1	-1	1	1	9	66
150	376	0	-1	3	1	9	67
-100	402	1	1	3	1	9	68
-200	291	1	1	2	1	9	69
350	398	0	1	3	1	9	70
200	474	1	-1	3	1	9	71
250	431	0	-1	2	1	9	72
100	323	1	1	2	1	9	73
0	225	1	1	1	1	9	74
250	493	1	-1	3	1	9	75
125	311	1	1	1	1	9	76
350	475	1	-1	2	1	9	77
-200	343	1	1	3	1	9	78
150	382	1	-1	2	1	9	79
-100	383	1	1	3	1	9	80
75	295	1	-1	2	1	9	81
100	324	1	1	2	1	9	82
150	465	1	1	3	1	9	83
-200	229	1	-1	1	1	9	84
200	339	0	-1	1	1	9	85
100	342	1	1	2	1	9	86
175	403	1	-1	2	1	9	87
-200	360	1	1	2	1	9	89
-100	383	1	-1	3	1	9	90
175	469	1	-1	3	1	9	91
250	465	1	-1	1	1	9	92
-100	248	1	1	1	1	9	93
350	528	1	1	3	1	9	94
0	235	1	-1	1	1	9	95
125	345	1	1	1	1	9	96
175	359	1	1	1	1	9	97
200	453	1	-1	3	1	9	98
150	337	1	-1	1	1	9	99
125	307	1	-1	1	1	9	100
250	542	1	-1	3	1	9	101
-100	311	1	1	2	1	9	103
-200	262	1	1	2	1	9	104
-100	252	1	1	1	1	9	105
75	315	1	-1	1	1	9	106
75	287	1	1	2	1	9	107
200	400	1	1	2	1	9	108
75	283	1	-1	1	1	9	109
75	324	1	-1	2	1	9	110
150	395	1	-1	2	1	9	111
75	380	1	1	3	1	9	112
-100	338	1	-1	3	1	9	113
350	547	1	1	1	1	9	114
0	312	1	-1	3	1	9	115
-200	428	1	1	3	1	9	116
-200	489	1	1	3	1	9	117
150	386	1	-1	2	1	9	118
125	336	1	-1	2	1	9	119
125	287	1	1	1	1	9	120
350	509	0	-1	2	1	9	121
250	352	0	-1	3	1	9	122
175	470	0	1	3	1	9	123
175	362	1	1	1	1	9	124
-100	261	1	1	2	1	9	125
-100	242	1	1	2	1	9	126
100	289	1	1	1	1	9	127
100	284	1	-1	1	1	9	128
-200	483	0	1	3	1	9	129
250	321	0	-1	2	1	9	130
175	427	1	1	3	1	9	131
200	347	0	-1	1	1	9	132
200	479	1	-1	3	1	9	133
100	356	1	1	3	1	9	134
125	294	0	-1	3	1	9	135
200	441	1	-1	1	1	9	136
-200	232	1	1	1	1	9	137
150	363	1	-1	3	1	9	138
-100	261	1	-1	2	1	9	139
250	362	0	1	2	1	9	140
-200	259	1	1	2	1	9	142
350	528	1	1	1	1	9	143
0	252	1	-1	1	1	9	144
0	252	1	1	2	1	9	145
150	357	1	1	1	1	9	146
175	416	1	-1	2	1	9	147
75	389	1	-1	3	1	9	148
-200	243	1	1	2	1	9	149
-100	247	1	-1	2	1	9	150
175	412	1	1	2	1	10	2
125	303	1	1	2	1	10	3
150	329	0	-1	3	1	10	5
150	282	0	-1	1	1	10	6
-200	210	1	-1	1	1	10	7
200	366	1	1	1	1	10	8
-100	229	1	-1	2	1	10	9
150	369	1	-1	1	1	10	11
250	428	0	1	3	1	10	12
125	318	0	-1	3	1	10	13
100	333	0	-1	3	1	10	14
-100	199	1	-1	2	1	10	15
75	259	1	1	1	1	10	16
350	507	1	1	3	1	10	17
-200	297	1	1	2	1	10	18
175	355	0	-1	3	1	10	19
250	288	1	1	1	1	10	20
-200	239	1	1	2	1	10	21
175	429	0	1	3	1	10	22
350	356	0	-1	1	1	10	23
100	336	1	-1	2	1	10	24
75	316	1	-1	3	1	10	25
100	258	1	1	1	1	10	26
250	420	1	1	2	1	10	27
200	380	1	1	1	1	10	28
0	252	1	1	3	1	10	29
-200	223	1	1	1	1	10	30
0	272	1	1	1	1	10	31
-200	242	1	-1	2	1	10	32
75	334	1	-1	2	1	10	33
-100	273	1	-1	2	1	10	34
125	361	1	1	2	1	10	35
0	260	1	1	3	1	10	36
0	272	1	-1	3	1	10	37
0	216	1	-1	2	1	10	38
100	312	1	-1	1	1	10	39
150	288	0	-1	1	1	10	40
-100	232	1	-1	1	1	10	41
-200	268	1	-1	3	1	10	42
250	497	1	1	3	1	10	43
-100	255	1	1	2	1	10	44
200	342	0	-1	1	1	10	45
100	303	1	1	2	1	10	46
150	406	1	-1	3	1	10	47
75	334	1	1	3	1	10	48
125	370	1	1	3	1	10	49
200	411	1	1	1	1	10	50
350	300	0	-1	1	1	10	51
0	294	1	-1	3	1	10	52
-100	223	1	-1	1	1	10	53
-100	222	1	-1	1	1	10	54
250	402	1	1	1	1	10	55
175	392	1	1	2	1	10	56
-200	230	1	1	2	1	10	57
175	460	1	-1	3	1	10	58
75	305	1	-1	2	1	10	59
125	423	1	1	3	1	10	60
350	595	1	1	3	1	10	61
175	440	1	-1	3	1	10	63
150	352	1	-1	2	1	10	64
-200	305	1	1	3	1	10	65
-100	205	1	-1	1	1	10	66
250	454	1	-1	2	1	10	67
-200	294	1	1	2	1	10	68
125	363	1	-1	2	1	10	69
75	298	1	1	2	1	10	70
200	398	1	1	1	1	10	71
100	285	1	1	1	1	10	72
150	383	1	-1	3	1	10	73
75	321	1	-1	2	1	10	74
350	309	0	-1	1	1	10	75
350	434	0	1	3	1	10	76
100	387	0	-1	3	1	10	77
125	355	1	1	3	1	10	78
-200	285	1	1	1	1	10	79
-100	224	1	-1	1	1	10	80
-200	245	1	1	1	1	10	81
125	335	1	-1	2	1	10	82
250	552	0	-1	2	1	10	83
0	256	1	-1	2	1	10	84
350	391	0	-1	1	1	10	85
200	388	1	1	1	1	10	87
175	439	1	1	3	1	10	88
-200	262	1	1	2	1	10	89
200	494	1	-1	3	1	10	90
250	479	1	1	2	1	10	91
-100	229	1	1	2	1	10	92
100	292	1	-1	1	1	10	93
0	196	1	1	1	1	10	94
150	401	1	1	3	1	10	95
-100	252	1	1	2	1	10	96
75	234	1	1	2	1	10	97
150	386	0	-1	1	1	10	98
125	371	1	-1	3	1	10	99
100	287	0	-1	3	1	10	100
-100	264	1	-1	2	1	10	101
175	318	1	1	1	1	10	102
175	347	1	-1	1	1	10	103
-100	286	1	1	3	1	10	104
-200	249	1	1	1	1	10	105
75	333	1	-1	3	1	10	106
250	419	1	-1	1	1	10	107
200	472	1	1	3	1	10	108
0	268	1	-1	3	1	10	109
175	370	1	-1	2	1	10	110
350	380	1	1	3	1	10	111
200	320	0	-1	1	1	10	112
-200	237	1	-1	2	1	10	113
-100	198	1	1	1	1	10	114
150	336	1	1	1	1	10	115
350	597	1	1	2	1	10	116
-200	279	1	1	2	1	10	117
250	439	1	1	3	1	10	118
125	374	1	1	2	1	10	119
250	388	0	-1	2	1	10	120
100	329	1	-1	2	1	10	121
125	299	0	-1	3	1	10	122
150	414	1	1	3	1	10	123
75	321	1	1	3	1	10	124
0	232	1	1	1	1	10	125
-100	277	1	1	3	1	10	126
200	240	0	1	1	1	10	127
-100	267	1	-1	3	1	10	128
0	240	1	1	2	1	10	129
75	289	1	-1	1	1	10	130
150	342	1	-1	1	1	10	131
-200	233	1	1	2	1	10	132
175	458	1	-1	3	1	10	133
250	420	1	1	1	1	10	134
200	431	1	-1	3	1	10	135
100	310	1	-1	1	1	10	136
-200	218	1	1	2	1	10	137
100	281	1	1	1	1	10	138
-100	233	1	-1	2	1	10	139
350	484	1	1	2	1	10	140
-200	307	1	-1	2	1	10	141
75	334	1	1	3	1	10	142
125	347	1	-1	2	1	10	143
175	378	1	-1	1	1	10	144
0	220	1	-1	1	1	10	145
75	287	1	-1	1	1	10	146
100	327	1	1	3	1	10	147
125	329	1	-1	1	1	10	148
-200	238	1	-1	2	1	10	149
200	416	1	-1	2	1	10	150
150	365	1	-1	1	1	11	1
200	369	1	1	2	1	11	2
175	388	1	1	3	1	11	3
125	342	1	1	2	1	11	4
-200	271	1	1	2	1	11	6
125	380	1	-1	3	1	11	7
-100	251	1	-1	1	1	11	8
350	459	1	1	2	1	11	9
75	300	1	1	1	1	11	10
175	335	0	-1	2	1	11	11
-200	309	1	-1	3	1	11	12
0	229	1	1	1	1	11	13
350	382	0	-1	1	1	11	14
75	276	1	1	1	1	11	15
200	416	1	1	3	1	11	16
0	299	1	-1	2	1	11	17
125	289	1	1	1	1	11	18
-100	224	1	-1	1	1	11	19
75	427	0	-1	3	1	11	20
-100	275	1	-1	3	1	11	21
-200	265	1	1	3	1	11	22
350	419	0	-1	2	1	11	23
250	461	1	1	3	1	11	24
175	405	0	-1	1	1	11	25
0	246	1	1	2	1	11	26
100	297	1	-1	1	1	11	27
150	387	0	-1	1	1	11	28
-100	275	1	1	3	1	11	29
200	458	1	1	3	1	11	30
250	405	0	-1	2	1	11	31
-200	235	1	1	2	1	11	32
250	408	0	1	2	1	11	33
-200	252	1	-1	3	1	11	34
100	340	1	1	3	1	11	35
100	357	1	-1	3	1	11	36
100	333	1	-1	2	1	11	37
100	287	1	1	1	1	11	38
250	463	1	-1	3	1	11	39
150	402	1	-1	3	1	11	40
75	307	1	-1	2	1	11	41
-100	207	1	1	1	1	11	42
-100	263	1	-1	2	1	11	43
0	195	1	-1	1	1	11	44
-200	265	1	1	2	1	11	45
0	280	1	1	3	1	11	46
75	275	1	1	1	1	11	47
200	360	1	1	1	1	11	48
150	367	1	-1	2	1	11	49
250	443	1	-1	1	1	11	50
150	429	1	-1	3	1	11	51
125	401	1	-1	3	1	11	52
-200	273	1	-1	2	1	11	53
175	427	1	1	3	1	11	54
125	347	1	1	2	1	11	55
-100	241	1	-1	1	1	11	56
-200	260	1	1	2	1	11	57
175	377	1	-1	1	1	11	58
0	228	1	1	1	1	11	59
100	372	1	1	3	1	11	60
350	526	1	1	2	1	11	61
200	338	1	1	1	1	11	62
75	305	1	-1	1	1	11	63
350	428	1	1	3	1	11	64
-100	236	1	1	2	1	11	65
-100	214	1	-1	2	1	11	66
175	365	1	1	3	1	11	67
125	257	0	1	1	1	11	68
-200	281	1	-1	3	1	11	69
200	329	0	1	1	1	11	70
250	424	0	-1	3	1	11	71
350	354	0	-1	2	1	11	72
75	296	1	1	2	1	11	73
200	364	0	-1	3	1	11	74
175	387	1	-1	1	1	11	75
0	199	1	1	1	1	11	76
75	340	1	1	2	1	11	77
-200	240	1	-1	1	1	11	78
350	364	0	-1	2	1	11	79
100	306	1	1	3	1	11	80
-100	240	1	1	1	1	11	81
-100	235	1	-1	2	1	11	82
350	408	1	1	2	1	11	83
150	351	1	-1	1	1	11	84
125	359	1	1	3	1	11	85
350	545	0	-1	3	1	11	86
250	348	0	-1	3	1	11	87
150	351	1	-1	2	1	11	88
175	373	1	1	2	1	11	89
-200	325	1	1	3	1	11	90
-200	218	1	1	1	1	11	91
175	335	1	-1	2	1	11	92
-100	208	1	-1	1	1	11	93
0	272	1	-1	3	1	11	94
150	296	0	1	1	1	11	95
125	345	1	1	3	1	11	96
0	213	1	1	1	1	11	97
200	364	1	1	2	1	11	98
125	334	1	-1	1	1	11	99
250	443	1	1	3	1	11	100
250	436	0	-1	3	1	11	101
-200	235	1	1	1	1	11	102
-100	307	1	1	3	1	11	103
75	328	1	1	2	1	11	104
-200	224	1	-1	2	1	11	105
100	328	1	1	2	1	11	106
200	469	1	-1	3	1	11	107
100	302	1	1	2	1	11	108
100	289	1	-1	1	1	11	109
175	388	1	1	3	1	11	110
150	348	1	1	1	1	11	111
100	303	1	-1	1	1	11	112
-200	185	1	1	1	1	11	113
-100	217	1	-1	1	1	11	114
75	320	1	-1	2	1	11	115
250	435	0	-1	2	1	11	116
-100	285	1	-1	3	1	11	117
0	258	1	1	3	1	11	118
200	401	0	-1	3	1	11	119
200	392	1	-1	2	1	11	120
0	212	1	-1	1	1	11	121
175	337	1	1	2	1	11	122
125	358	1	1	3	1	11	123
75	328	1	-1	3	1	11	124
175	359	1	-1	1	1	11	126
-200	291	1	1	2	1	11	127
-100	258	1	-1	3	1	11	128
200	406	1	-1	1	1	11	129
150	341	1	-1	2	1	11	130
125	409	1	-1	3	1	11	131
-100	244	1	1	1	1	11	132
250	397	1	1	1	1	11	133
250	342	0	-1	2	1	11	134
75	343	1	1	3	1	11	135
100	297	1	1	1	1	11	136
125	408	1	1	3	1	11	137
-200	226	1	1	1	1	11	138
-100	251	1	1	2	1	11	139
350	386	1	1	3	1	11	140
0	290	1	-1	3	1	11	141
150	393	1	-1	2	1	11	142
350	305	1	-1	1	1	11	143
-200	268	1	1	2	1	11	144
175	399	1	-1	2	1	11	145
0	224	1	1	2	1	11	146
125	366	1	-1	3	1	11	147
350	433	1	1	1	1	11	148
250	472	0	-1	1	1	11	149
-100	318	1	1	3	1	11	150
250	447	1	-1	2	1	12	1
125	321	1	1	2	1	12	2
100	274	1	-1	1	1	12	3
0	235	1	1	2	1	12	4
150	327	1	1	2	1	12	5
-200	253	1	-1	2	1	12	6
200	369	0	-1	2	1	12	7
-100	281	1	1	3	1	12	8
75	315	1	1	3	1	12	9
250	378	0	1	1	1	12	10
150	432	1	-1	3	1	12	11
-100	257	1	-1	2	1	12	12
175	314	1	1	1	1	12	13
175	399	1	1	3	1	12	14
150	347	1	1	3	1	12	15
350	391	1	1	1	1	12	16
75	324	1	-1	3	1	12	18
-200	207	1	-1	1	1	12	19
-100	227	1	-1	1	1	12	20
100	336	1	-1	3	1	12	21
125	321	1	1	2	1	12	22
200	352	1	1	1	1	12	23
-200	244	1	-1	1	1	12	24
175	419	1	1	2	1	12	25
350	543	1	1	2	1	12	26
75	310	1	-1	2	1	12	27
250	449	1	1	3	1	12	28
200	382	0	-1	3	1	12	29
0	192	1	1	1	1	12	30
-200	231	1	-1	1	1	12	31
125	406	1	-1	3	1	12	32
-100	200	1	-1	1	1	12	33
0	250	1	1	1	1	12	34
350	370	0	1	2	1	12	35
-100	241	1	-1	2	1	12	36
100	304	1	1	2	1	12	37
200	338	1	1	1	1	12	38
125	346	1	1	3	1	12	39
150	294	0	-1	1	1	12	40
-200	299	1	-1	3	1	12	41
250	349	1	1	3	1	12	42
75	289	1	-1	1	1	12	43
-100	263	1	-1	2	1	12	44
-200	279	1	-1	2	1	12	45
175	356	1	1	1	1	12	46
100	316	1	1	3	1	12	47
200	394	0	-1	3	1	12	48
75	298	1	1	1	1	12	49
75	333	1	1	3	1	12	50
150	329	0	-1	2	1	12	51
175	347	1	1	1	1	12	52
-200	238	1	-1	2	1	12	53
125	330	1	1	3	1	12	54
-200	238	1	-1	1	1	12	55
0	237	1	1	2	1	12	56
-100	250	1	-1	2	1	12	57
175	416	0	-1	3	1	12	58
0	238	1	1	1	1	12	59
125	329	1	1	2	1	12	60
350	524	1	1	2	1	12	61
350	472	0	-1	1	1	12	62
250	401	0	-1	2	1	12	63
100	316	1	-1	1	1	12	64
250	328	1	1	2	1	12	65
200	299	1	1	1	1	12	66
-100	280	1	-1	3	1	12	67
-200	270	1	1	3	1	12	68
-100	213	1	-1	1	1	12	69
350	264	0	-1	3	1	12	70
0	256	1	-1	3	1	12	71
150	361	1	1	3	1	12	72
250	362	0	-1	1	1	12	73
150	354	1	-1	3	1	12	74
75	274	0	-1	3	1	12	75
125	330	1	-1	1	1	12	76
75	304	1	1	3	1	12	77
-100	257	1	-1	3	1	12	78
150	220	0	-1	1	1	12	79
200	365	1	1	2	1	12	80
-100	237	1	1	2	1	12	81
-200	204	1	1	1	1	12	82
150	337	1	1	1	1	12	84
250	427	0	-1	2	1	12	85
350	558	1	1	3	1	12	86
200	367	1	1	3	1	12	87
100	336	1	-1	2	1	12	88
350	359	1	1	2	1	12	89
125	321	0	1	2	1	12	90
-200	231	1	-1	2	1	12	91
-100	178	0	-1	3	1	12	92
175	308	1	1	3	1	12	93
0	229	1	-1	2	1	12	94
100	300	1	1	1	1	12	95
-200	207	1	1	1	1	12	96
100	287	1	1	1	1	12	97
200	386	1	1	3	1	12	98
250	338	0	-1	1	1	12	99
75	351	1	-1	3	1	12	100
350	451	0	-1	2	1	12	101
-100	232	1	1	2	1	12	102
0	209	1	-1	1	1	12	103
0	189	1	1	1	1	12	104
-200	236	1	-1	2	1	12	105
-200	260	1	-1	3	1	12	106
125	271	1	1	1	1	12	107
175	346	1	-1	1	1	12	108
100	277	1	1	1	1	12	109
350	389	1	1	2	1	12	110
125	329	1	1	2	1	12	111
75	311	1	-1	2	1	12	112
-100	266	1	-1	3	1	12	113
350	393	1	1	3	1	12	114
250	318	1	1	3	1	12	115
-200	303	1	1	3	1	12	116
-100	240	1	-1	2	1	12	117
100	293	1	1	2	1	12	118
250	373	0	-1	3	1	12	119
200	452	1	-1	1	1	12	120
75	363	0	-1	3	1	12	121
175	387	1	1	1	1	12	122
350	367	1	1	2	1	12	123
0	273	1	1	3	1	12	124
-100	262	1	-1	3	1	12	125
-100	254	1	1	3	1	12	126
125	324	1	1	2	1	12	127
150	285	0	-1	3	1	12	128
-200	268	1	1	2	1	12	129
150	351	1	1	1	1	12	130
175	465	1	-1	3	1	12	131
75	282	1	-1	1	1	12	132
250	436	1	1	3	1	12	133
125	306	1	-1	1	1	12	134
175	392	1	-1	2	1	12	135
200	414	1	-1	1	1	12	136
-100	295	1	1	3	1	12	137
-200	273	1	-1	2	1	12	138
150	311	0	-1	2	1	12	139
0	239	1	1	2	1	12	140
-200	215	1	1	1	1	12	141
100	331	1	1	1	1	12	143
200	366	0	-1	2	1	12	144
100	332	1	-1	3	1	12	145
150	321	1	1	3	1	12	146
200	280	0	-1	2	1	12	147
100	285	1	1	1	1	12	148
-200	242	1	1	2	1	12	149
75	282	1	-1	2	1	12	150
125	363	1	1	3	1	13	1
75	323	1	-1	3	1	13	2
150	345	1	-1	1	1	13	3
125	280	0	-1	1	1	13	4
0	203	1	-1	1	1	13	5
-100	224	1	1	1	1	13	6
0	215	1	-1	1	1	13	7
350	466	1	1	1	1	13	8
-200	287	1	-1	3	1	13	9
-200	272	1	1	3	1	13	10
175	385	1	1	3	1	13	11
200	282	1	1	2	1	13	12
100	299	1	1	3	1	13	13
175	338	0	-1	2	1	13	14
350	338	1	1	1	1	13	15
125	384	1	-1	3	1	13	16
-100	249	1	1	2	1	13	17
-200	214	1	1	1	1	13	18
200	368	0	-1	2	1	13	19
150	306	0	-1	2	1	13	20
-100	289	1	-1	3	1	13	21
350	546	1	1	2	1	13	22
75	298	1	1	2	1	13	23
100	315	1	-1	2	1	13	24
250	462	1	-1	2	1	13	25
175	389	1	1	1	1	13	26
150	320	0	-1	3	1	13	27
100	265	1	-1	1	1	13	28
-100	195	1	-1	1	1	13	29
0	220	1	1	2	1	13	30
250	247	0	-1	2	1	13	31
-100	237	1	1	2	1	13	32
250	378	0	-1	1	1	13	33
75	307	1	-1	3	1	13	34
200	414	0	-1	3	1	13	35
-200	268	1	1	3	1	13	36
150	310	1	1	2	1	13	37
200	391	1	1	3	1	13	38
150	273	1	1	3	1	13	39
350	338	1	1	3	1	13	40
250	426	1	-1	2	1	13	41
125	275	0	-1	2	1	13	42
125	326	1	1	2	1	13	43
-200	254	1	1	1	1	13	44
-100	277	1	-1	3	1	13	45
-200	220	1	-1	1	1	13	46
100	305	1	1	1	1	13	47
175	221	1	1	1	1	13	48
175	382	1	1	3	1	13	49
0	227	1	1	2	1	13	50
0	264	1	1	2	1	13	51
250	397	1	1	1	1	13	52
75	343	1	-1	3	1	13	53
-100	271	0	-1	3	1	13	54
150	246	1	1	1	1	13	55
-100	270	1	-1	3	1	13	56
175	356	1	1	3	1	13	57
-200	250	1	1	2	1	13	58
0	208	1	1	3	1	13	59
100	240	0	-1	1	1	13	60
100	306	0	-1	2	1	13	61
350	376	0	-1	1	1	13	62
250	440	0	-1	1	1	13	63
200	393	1	-1	1	1	13	64
75	337	1	-1	2	1	13	65
-200	228	1	1	1	1	13	66
350	314	0	-1	3	1	13	67
-100	231	1	1	1	1	13	68
-200	234	1	-1	2	1	13	70
75	305	1	1	3	1	13	71
200	363	1	1	2	1	13	72
250	415	1	1	3	1	13	73
100	365	1	-1	3	1	13	74
350	316	1	1	1	1	13	75
75	267	1	1	3	1	13	76
-200	254	1	-1	3	1	13	77
0	190	1	1	1	1	13	78
-100	210	1	-1	1	1	13	79
175	298	0	-1	1	1	13	80
125	345	1	1	1	1	13	81
0	204	1	1	1	1	13	82
200	352	1	1	2	1	13	83
-200	229	1	-1	1	1	13	84
75	372	1	-1	3	1	13	85
350	331	0	-1	2	1	13	86
250	374	0	-1	1	1	13	87
150	359	1	1	2	1	13	88
175	355	1	-1	2	1	13	89
-200	279	1	1	3	1	13	90
250	327	1	1	3	1	13	91
-100	252	1	1	2	1	13	92
75	330	1	-1	2	1	13	93
200	440	1	-1	3	1	13	94
200	402	1	1	2	1	13	95
-100	245	1	-1	2	1	13	96
175	378	0	-1	2	1	13	97
0	261	1	-1	3	1	13	98
100	362	1	1	3	1	13	99
350	326	1	1	3	1	13	100
125	340	1	-1	2	1	13	101
125	323	1	-1	1	1	13	102
-200	300	1	1	3	1	13	103
-200	229	1	-1	2	1	13	104
150	348	1	1	1	1	13	105
100	289	1	1	1	1	13	106
150	325	1	-1	1	1	13	107
150	371	1	1	2	1	13	109
175	471	1	1	3	1	13	110
125	300	1	-1	1	1	13	111
175	374	1	-1	3	1	13	112
-200	300	1	1	2	1	13	113
-100	251	1	1	1	1	13	114
125	388	1	-1	3	1	13	115
100	308	1	1	2	1	13	116
-100	231	1	1	2	1	13	117
250	402	0	-1	1	1	13	118
0	206	1	1	1	1	13	119
100	344	1	-1	3	1	13	120
175	380	0	-1	3	1	13	121
200	354	0	-1	2	1	13	122
75	283	0	1	3	1	13	123
200	394	1	1	1	1	13	124
-200	370	1	1	3	1	13	125
0	263	1	1	1	1	13	126
200	395	1	1	2	1	13	127
-100	304	1	1	1	1	13	128
-200	213	1	1	1	1	13	129
350	442	0	-1	3	1	13	130
125	346	1	1	2	1	13	131
350	543	1	1	2	1	13	132
250	416	1	1	3	1	13	133
150	368	0	-1	2	1	13	134
75	342	1	-1	3	1	13	135
150	355	1	-1	1	1	13	136
-100	231	1	-1	1	1	13	137
-100	264	1	1	2	1	13	139
100	350	1	-1	3	1	13	140
-200	261	1	-1	1	1	13	141
350	306	0	-1	1	1	13	142
75	283	1	-1	2	1	13	143
250	460	1	1	3	1	13	144
150	359	1	1	3	1	13	145
75	283	1	1	1	1	13	146
75	326	1	-1	3	1	13	147
125	348	1	-1	2	1	13	148
0	243	1	-1	3	1	13	149
175	389	1	1	1	1	13	150
350	523	1	1	1	1	14	1
100	285	1	-1	1	1	14	2
0	188	1	1	1	1	14	3
-200	250	1	-1	1	1	14	5
150	237	0	1	3	1	14	7
-100	160	0	-1	2	1	14	8
-100	264	1	1	3	1	14	9
125	301	1	1	2	1	14	10
125	271	1	-1	1	1	14	11
350	355	0	-1	2	1	14	12
200	321	0	1	3	1	14	13
250	443	0	-1	3	1	14	14
175	384	1	1	1	1	14	15
200	237	0	-1	1	1	14	16
175	437	1	-1	3	1	14	17
150	353	1	1	3	1	14	18
-200	258	1	1	2	1	14	19
-200	243	1	1	2	1	14	20
100	355	1	-1	3	1	14	21
250	396	0	-1	3	1	14	22
350	414	1	1	2	1	14	23
-100	242	1	1	1	1	14	24
75	311	1	-1	1	1	14	26
150	331	1	-1	1	1	14	27
0	215	1	1	2	1	14	28
125	302	1	-1	1	1	14	29
250	522	1	1	3	1	14	30
-200	241	1	-1	2	1	14	31
-100	207	1	1	1	1	14	32
0	292	1	1	3	1	14	33
100	277	1	1	1	1	14	34
175	381	1	1	3	1	14	35
-100	271	1	-1	3	1	14	36
0	269	1	-1	3	1	14	37
150	370	0	-1	2	1	14	39
0	332	1	1	3	1	14	40
200	372	1	1	2	1	14	41
250	261	0	1	1	1	14	42
-200	239	1	-1	2	1	14	43
-100	235	1	1	2	1	14	44
350	579	0	-1	3	1	14	45
-200	235	1	1	1	1	14	46
250	471	1	1	2	1	14	47
150	303	0	-1	2	1	14	48
250	456	1	1	1	1	14	49
175	371	1	1	2	1	14	50
100	340	1	-1	3	1	14	51
125	294	1	1	2	1	14	52
-200	279	1	-1	3	1	14	53
75	273	1	-1	1	1	14	54
-100	296	1	1	3	1	14	55
350	389	0	-1	3	1	14	56
-100	206	1	-1	1	1	14	57
0	154	0	-1	3	1	14	58
200	331	1	1	1	1	14	59
100	289	1	1	1	1	14	60
200	254	1	1	2	1	14	61
100	300	1	1	3	1	14	62
125	249	1	1	3	1	14	63
-200	204	1	-1	1	1	14	64
175	367	0	-1	2	1	14	65
350	458	1	1	3	1	14	67
-100	232	1	-1	2	1	14	68
-200	188	1	1	1	1	14	69
75	229	0	-1	2	1	14	70
75	266	1	-1	1	1	14	71
125	322	1	1	2	1	14	72
125	393	1	-1	3	1	14	73
175	399	1	1	3	1	14	74
100	284	1	-1	1	1	14	75
-200	299	1	-1	2	1	14	76
100	274	1	1	1	1	14	77
0	253	1	-1	3	1	14	78
-100	240	1	-1	1	1	14	79
250	437	1	1	3	1	14	80
0	216	1	-1	2	1	14	81
200	261	1	1	3	1	14	82
100	273	0	-1	2	1	14	83
-100	200	1	1	2	1	14	84
250	334	1	1	1	1	14	85
125	331	1	1	2	1	14	86
75	326	1	-1	1	1	14	87
200	233	0	-1	2	1	14	88
-200	293	1	1	3	1	14	89
75	294	1	1	2	1	14	90
175	374	0	-1	3	1	14	91
-200	236	1	1	2	1	14	92
-100	194	1	-1	1	1	14	93
150	361	0	-1	3	1	14	94
75	272	1	1	1	1	14	95
200	346	1	1	1	1	14	96
125	289	1	1	1	1	14	97
250	238	0	-1	1	1	14	98
350	395	0	-1	3	1	14	99
0	255	1	1	3	1	14	100
-100	293	1	1	3	1	14	101
-200	357	1	-1	3	1	14	102
150	321	0	-1	2	1	14	103
-100	217	1	-1	1	1	14	104
150	357	1	1	2	1	14	105
175	381	1	-1	1	1	14	106
350	261	0	-1	1	1	14	107
350	578	1	-1	2	1	14	108
250	484	1	-1	3	1	14	109
0	251	1	-1	3	1	14	110
0	219	1	-1	2	1	14	111
200	359	1	1	2	1	14	112
-200	260	1	1	3	1	14	113
75	258	1	1	1	1	14	114
200	332	1	1	1	1	14	115
-100	274	1	1	1	1	14	116
100	333	1	-1	2	1	14	117
-200	223	1	1	2	1	14	118
175	384	1	1	2	1	14	119
150	318	1	1	3	1	14	120
250	400	1	1	2	1	14	121
125	320	0	1	3	1	14	123
100	324	1	1	2	1	14	124
200	403	1	1	3	1	14	125
-200	292	1	-1	3	1	14	126
350	382	1	1	2	1	14	127
-100	258	1	1	1	1	14	128
-200	233	1	-1	2	1	14	129
175	355	0	-1	3	1	14	130
150	421	1	1	3	1	14	131
0	263	1	-1	2	1	14	132
175	328	1	1	1	1	14	133
350	430	0	-1	2	1	14	134
125	319	1	1	1	1	14	135
-200	319	1	-1	3	1	14	137
75	319	1	1	2	1	14	138
350	299	0	-1	1	1	14	139
-100	221	1	1	1	1	14	140
100	288	1	-1	1	1	14	141
75	295	1	-1	2	1	14	142
125	366	1	1	3	1	14	143
-100	217	1	-1	1	1	14	144
125	328	1	1	1	1	14	145
150	343	1	-1	2	1	14	146
150	363	1	-1	1	1	14	147
75	299	1	1	2	1	14	148
150	306	1	-1	2	1	14	149
200	409	1	1	2	1	14	150
150	318	1	1	2	1	15	1
150	305	1	1	1	1	15	2
75	271	1	-1	1	1	15	3
250	333	1	1	2	1	15	4
-200	232	1	-1	1	1	15	5
125	310	1	1	3	1	15	6
100	337	1	-1	3	1	15	7
-100	256	1	-1	2	1	15	8
200	352	0	-1	2	1	15	9
0	226	1	1	1	1	15	10
125	309	0	1	3	1	15	11
-100	256	1	-1	2	1	15	12
100	345	1	1	3	1	15	13
175	318	0	-1	1	1	15	14
0	261	1	-1	3	1	15	15
350	351	0	-1	2	1	15	16
-200	262	1	-1	1	1	15	17
-200	255	1	-1	3	1	15	18
350	353	1	1	3	1	15	19
250	368	0	1	1	1	15	20
-100	270	1	1	2	1	15	21
250	366	0	-1	3	1	15	22
125	345	1	1	1	1	15	23
0	243	1	1	2	1	15	24
100	295	1	-1	1	1	15	25
175	340	1	1	2	1	15	26
200	361	1	1	1	1	15	27
[truncated: 24,016 more rows]
